# Supplementary material for: Reactive Power Planning Based on Novel Voltage Stability Index Including Renewable Energy Resources
Source: Research Square preprint supplement (doi:10.21203/rs.3.rs-6315484/v1), 2025-05-02
Supplement: Supplementary file 1 [file f73ef352cf7c6a6ac67dfb3e.docx]

**Appendix (1)**

**Data and assumption:**

The loads of IEEE nine-bus system have been increased to 200% of the standard IEEE nine-bus system (table 19). Assume the light load 40% of the full loading [71]. Both the rating of the generators and the scheduled output power have been introduced in Table 20. Table 21 presents the bus data and assumptions. The voltage limits 0.95 p.u <V<1.05 p.u during normal operation and V>0.9 pu. during contingency. Table 22 presents the line data, each line (A,B) is double circuits. Table 23. presents transformer data.

| Load ID | Terminal | Active Power | Reactive Power | Apparent Power |
| --- | --- | --- | --- | --- |
| Busbar | MW | Mvar | MVA |
| Load A | Bus 5 | 250 | 100 | 269.2582 |
| Load B | Bus 6 | 180 | 60 | 189.7367 |
| Load C | Bus 8 | 200 | 70 | 211.8962 |

Table 19. shows the load data of the modified IEEE 9-bus system.

| Name | Terminal | Bus T. | Voltage  Mag  (Schedule) | Voltage  angle | Rated Power | Lower limit  of reactive  power | Upper limit  of reactive power | Active  Power  (Schedule) | Gen Type |
| --- | --- | --- | --- | --- | --- | --- | --- | --- | --- |
|
|
|  | Busbar | PU | deg | MVA | Mvar | Mvar | MW |
| G1(A) | Bus 1 | SL | 1.04 | 0 | 247.5 | -77.2818 | 130.3787 | unknown | Hydro |
| (Gen A) |
| G1(B) | Bus 1 | PV | 1.04 | unknown | 247.5 | -77.2818 | 130.3787 | 71.6 | Hydro |
| (Gen B) |
| G2(A) | Bus 2 | PV | 1.025 | unknown | 192 | -59.9519 | 59.9519 | 163 | Wind |
| (Gen A) |
| G2(B) | Bus 2 | PV | 1.025 | unknown | 192 | -59.9519 | 59.9519 | 163 | Wind |
| (Gen B) |
| G3(A) | Bus 3 | PV | 1.025 | unknown | 128 | -39.9679 | 39.9679 | 85 | PV system |
| (Gen A) |
| G3(B) | Bus 3 | PV | 1.025 | unknown | 128 | -39.9679 | 39.9679 | 85 | PV system |
| (Gen B) |

Table. 20 presents the generation data of nine bus system

| Name | Bus Type | Nom.L-L  Volt. | | Voltage  Magnitude | Voltage  Magnitude Schedule | Voltage Angle | Active  Power | Reactive  Power |
| --- | --- | --- | --- | --- | --- | --- | --- | --- |
|  | kV | kV | p.u. | deg | MW | MVAR |
| Bus 1 (Gen Term A) | Slack |  | 16.5 | 17.16 | 1.04 | 0 | unknown | unknown |
| Bus 1 (Gen Term B) | PV |  | 16.5 | 17.16 | 1.04 | unknown | 71.6 | unknown |
| Bus 2 (Gen Term A) | PV |  | 18 | 18.45 | 1.025 | unknown | 163 | unknown |
| Bus 2 (Gen Term B) | PV |  | 18 | 18.45 | 1.025 | unknown | 163 | unknown |
| Bus 3 (Gen Term A) | PV |  | 13.8 | 14.145 | 1.025 | unknown | 85 | unknown |
| Bus 3 (Gen Term B) | PV |  | 13.8 | 14.145 | 1.025 | unknown | 85 | unknown |

Table 21. presents bus data

| Name | Terminal i | Terminal j | Resistance | Reactance | Susceptance | Thermal limit | |
| --- | --- | --- | --- | --- | --- | --- | --- |
|  | ohm | ohm | μS | (kA) | |
| Line 1(A) | Bus 5 | Bus 4 | 10.58 | 89.93 | 166.35 | | 0.5 |
| Line 1(B) | Bus 5 | Bus 4 | 10.58 | 89.93 | 166.35 | | 0.5 |
| Line 2(A) | Bus 7 | Bus 5 | 33.856 | 170.338 | 161.35 | | 0.5 |
| Line 2(B) | Bus 7 | Bus 5 | 33.856 | 170.338 | 161.35 | | 0.5 |
| Line 3(A) | Bus 7 | Bus 8 | 8.993 | 170.338 | 179.86 | | 0.5 |
| Line 3(B) | Bus 7 | Bus 8 | 8.993 | 170.338 | 179.86 | | 0.5 |
| Line 4(A) | Bus 8 | Bus 9 | 12.5902 | 106.6464 | 197.54 | | 0.5 |
| Line 4(B) | Bus 8 | Bus 9 | 12.5902 | 106.6464 | 197.54 | | 0.5 |
| Line 5(A) | Bus 9 | Bus 6 | 41.262 | 179.86 | 338.375 | | 0.5 |
| Line 5(B) | Bus 9 | Bus 6 | 41.262 | 179.86 | 338.375 | | 0.5 |
| Line 6(A) | Bus 6 | Bus 4 | 17.986 | 97.336 | 149.345 | | 0.5 |
| Line 6(B) | Bus 6 | Bus 4 | 17.986 | 97.336 | 149.345 | | 0.5 |

Table 22 presents the line data, each lines (A,B) are double circuits.

|  | power rated (MVA) | HV Side  Busbar | LV Side  Busbar | HV Side (kV) | LV Side kV | impedance % |
| --- | --- | --- | --- | --- | --- | --- |
| T1(A) | 250 | Bus 4 | Bus 1 (Gen Term A) | 230 | 16.5 | 14.4 |
| T1(B) | 250 | Bus 4 | Bus 1 (Gen Term B) | 230 | 16.5 | 14.4 |
| T2(A) | 200 | Bus 7 | Bus 2 (Gen Term A) | 230 | 18 | 12.5 |
| T2(B) | 200 | Bus 7 | Bus 2 (Gen Term B) | 230 | 18 | 12.5 |
| T3(A) | 150 | Bus 9 | Bus 3 (Gen Term A) | 230 | 13.8 | 8.79 |
| T3(B) | 150 | Bus 9 | Bus 3 (Gen Term B) | 230 | 13.8 | 8.79 |

Table 23. presents transformer data

**Appendix (2)**

To calculate the dQ of the compensator of bus (5):

dv/dQ(bus5)= 0.00091815 p.u/MVAR. & dv=0.05,

dQ/dv= 1089.15 MVAR/p.u

dQ= dQ/dv x dv = 1089.15 x0.05=54.5 MVAR.

In digsilent program , if the capacitor rating has been selected as 54.5 MVAR, the Capacitor will produce 54.5 MVAR at rated voltage (1 p.u), but The capacitor output at 0.95 p.u will produce reactive power less than 54.5 MVAR, so that, of the capacitor rating must be corrected to produce 54.5 MVAR at 0.95 p.u:

(Xc is constant with the voltage change)

The SVC rating has been selected as 60MVAR

**Appendix (3)**

**Input data and assumptions for Modified IEEE 14-bus system:**

The modified system has the same standard line and transformer parameters of IEEE 14-bus system but the loads and generations have been modified. All generation substation are renewable energy resources. Table (24) shows the type and installed capacity of the generation. The upper limit of the generator can be determined when the generator can operate with 85% power factor (p.f) lagging while the lower limit of the synchronous generator can be determined when the generator can operate with 95% power factor leading. The capability curve of both solar power plant and wind farm operate with power factor of 0.95 lag to 0.95 lead. Table (25) introduces the load and bus data.

| Gen Type | Terminal | Bus T. | Voltage  Mag  (Schedule) | Voltage  angle | Rated Power | Lower limit  of reactive  power | Upper limit  of reactive power | Active  Power  (Schedule) | Power factor |
| --- | --- | --- | --- | --- | --- | --- | --- | --- | --- |
|  | Busbar | PU | deg | MVA | Mvar | Mvar | MW |  |
| Wind | Bus 1 | PV | 1 | unknown | 190 | -59.32 | 59.32 | 150 | 0.95 |
|  |
| Photovoltaic(1) | Bus 2 | PQ | unknown | unknown | 95 | -29.66 | 29.66 | 75 | 0.95 |
|  |
| Photovoltaic(2) | Bus 3 | PQ | unknown | unknown | 150 | -46.8 | 46.8 | 120 | 0.95 |
|  |
| Photovoltaic(3) | Bus 6 | PQ | unknown | unknown | 40 | -12.48 | 12.48 | 32 | 0.95 |
|  |
| Hydro | Bus 8 | SL | 1 | 0 | 165 | -78 | 131.6 | unknown | 0.85 |

Table 24. presents the generation data of 14-bus system.

| Bus ID | Bus  Type | Nominal  Voltage kV | Voltage  Magnitude (p.u) | Voltage  Angle (deg) | Generation active Power (Mw) | Generation reactive Power (MVAR) | Loads active Power (Mw) | Loads reactive Power (MVAR) |
| --- | --- | --- | --- | --- | --- | --- | --- | --- |
| Bus_0001 | PV | 132 | 1 p.u (Schedule) | 0 | 150(Schedule) | Unknown | 0 | 0 |
| Bus_0002 | PQ | 132 | Unknown | Unknown | 75 | 24.7 | 32.55 | 19.05 |
| Bus_0003 | PQ | 132 | Unknown | Unknown | 120 | 84.2 | 141.3 | 28.65 |
| Bus_0004 | PQ | 132 | Unknown | Unknown | 0 | 0 | 71.7 | -5.85 |
| Bus_0005 | PQ | 132 | Unknown | Unknown | 0 | 0 | 11.4 | 2.4 |
| Bus_0006 | PQ | 33 | Unknown | Unknown | 32 | 10.5 | 16.8 | 11.25 |
| Bus_0007 | PQ | 1 | Unknown | Unknown | 0 | 0 | 0 | 0 |
| Bus_0008 | Slack | 11 | 1 p.u (Schedule) | Unknown | Unknown | Unknown | 0 | 0 |
| Bus_0009 | PQ | 33 | Unknown | Unknown | 0 | 0 | 44.25 | 24.9 |
| Bus_0010 | PQ | 33 | Unknown | Unknown | 0 | 0 | 13.5 | 8.7 |
| Bus_0011 | PQ | 33 | Unknown | Unknown | 0 | 0 | 5.25 | 2.7 |
| Bus_0012 | PQ | 33 | Unknown | Unknown | 0 | 0 | 9.15 | 2.4 |
| Bus_0013 | PQ | 33 | Unknown | Unknown | 0 | 0 | 20.7 | 8.7 |
| Bus_0014 | PQ | 33 | Unknown | Unknown | 0 | 0 | 22.35 | 7.5 |

Table 25. presents bus data
